# Supplementary material
Source: PubMed Central journal article supplement (PMC2572942)
Supplement: 0808070105_0808070105SI.pdf [file 0808070105_0808070105SI.pdf]

# Supporting Information

Venanzi *et al.* 10.1073/pnas.0808070105

Other Supporting Information Files

[Table S1](#)
